# Supplementary material for: Stability and Retention of Nanoemulsion Formulations Incorporating Lavender Essential Oil
Source: MDPI journal article supplement (doi:10.3390/cosmetics11030065), 2024-04-23
Supplement: s1 [file s1]

*Article*

# **Formulation of nanoemulsions incorporating lavender essential oil, stability and retention**

**Konstantina Flekka <sup>1</sup>, Virginia D. Dimaki <sup>2</sup>, Elena Mourelatou <sup>3</sup>, Konstantinos Avgoustakis <sup>1</sup>, Fotini Lamari <sup>2</sup>, Sophia Hatziantoniou <sup>1,\*</sup>**

## Supplementary Materials

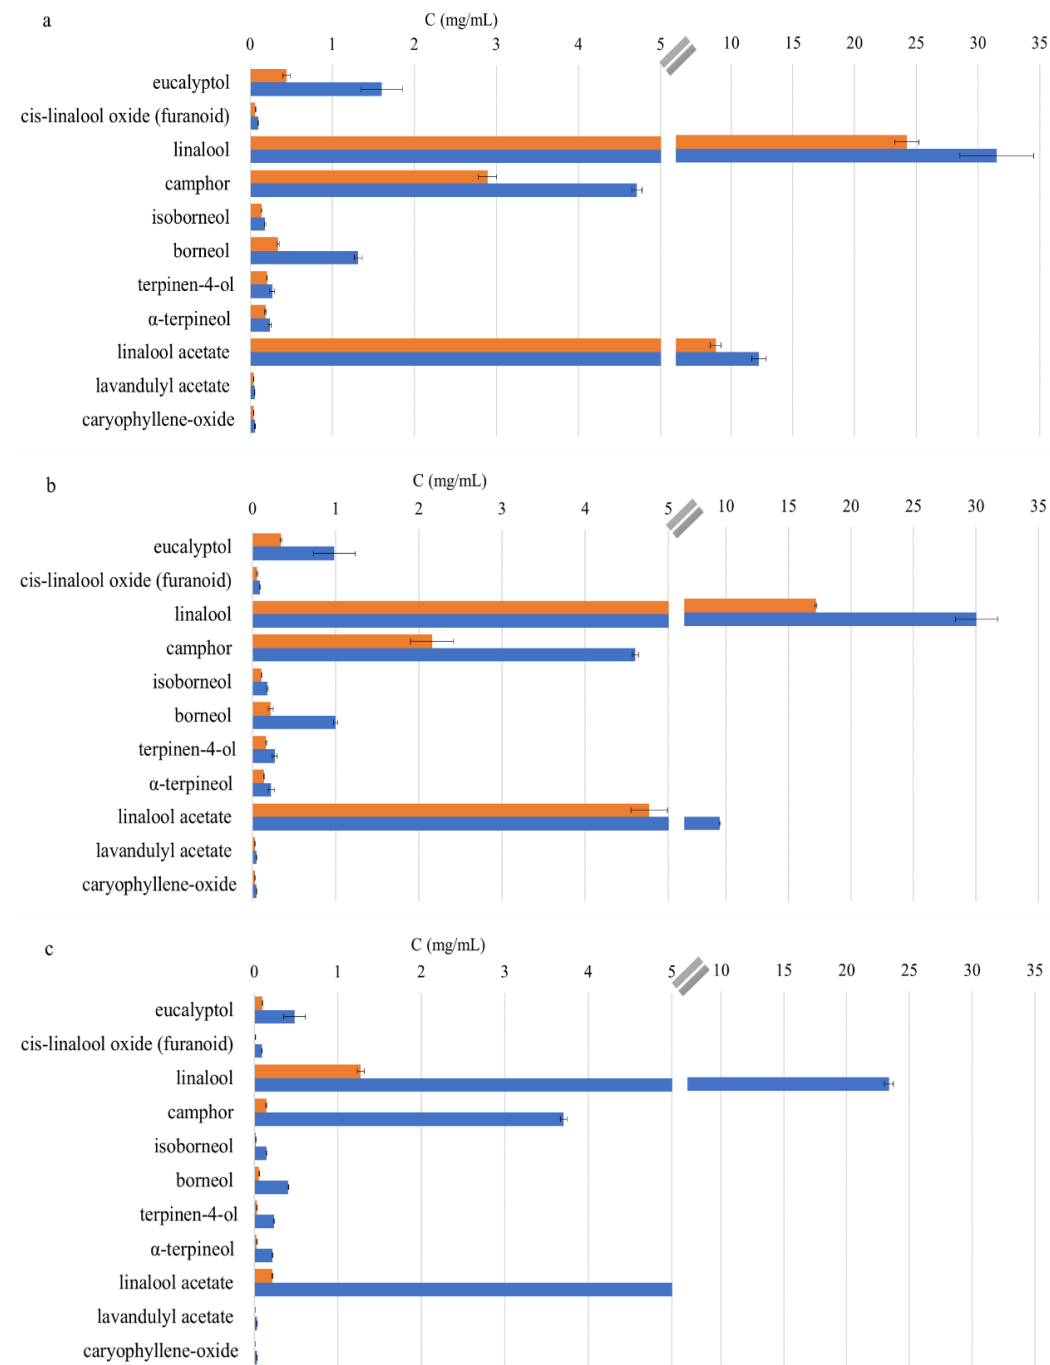

**Figure S1.** Content (mg/mL) of ingredients of LEO incorporated in CEL (■) and NEL (■), one day after preparation (a) and after 30 days (b) and 60 days (c) of storage at 4 °C.

**Table S1.** Percentage change of LEO content over time in CEL and NEL

| Sample<br>Time (days)<br>Components   | CEL                   |                       |                       |                       | NEL                |                     |                     |                     |
|---------------------------------------|-----------------------|-----------------------|-----------------------|-----------------------|--------------------|---------------------|---------------------|---------------------|
|                                       | 15                    | 30                    | 45                    | 60                    | 15                 | 30                  | 45                  | 60                  |
| eucalyptol <sup>1</sup>               | 8.40 ± 3.59           | 21.86 ± 10.06         | 50.00 ± 2.94          | 77.91 ± 2.10          | 13.75 ± 0.30       | 39.23 ± 6.45 *      | 54.13 ± 3.20        | 69.02 ± 12.84       |
| <i>cis</i> -linalool oxide (furanoid) | 5.90 ± 0.33 *         | 13.57 ± 9.87          | 48.64 ± 9.63          | 82.47 ± 0.68 *        | 2.34 ± 1.16        | 3.91 ± 1.92         | 3.91 ± 1.92         | 3.91 ± 1.92         |
| linalool <sup>1</sup>                 | 14.93 ± 1.89          | 28.99 ± 2.58          | 62.07 ± 1.67 *        | 94.74 ± 0.04 *        | 2.06 ± 1.74        | 4.51 ± 3.72         | 13.35 ± 7.25        | 25.59 ± 5.97        |
| camphor <sup>1</sup>                  | 10.50 ± 5.62          | 25.15 ± 11.72         | 59.42 ± 6.45          | 95.00 ± 0.36 *        | 0.22 ± 0.10        | 2.30 ± 0.53         | 11.81 ± 0.38        | 21.31 ± 0.23 *      |
| isoborneol                            | 8.85 ± 4.38           | 24.86 ± 4.96          | 56.72 ± 1.82 *        | 86.01 ± 0.50 *        | 3.45 ± 4.29        | 1.00 ± 0.82         | 10.75 ± 1.74        | 20.50 ± 2.67        |
| borneol <sup>1</sup>                  | 23.45 ± 4.71          | 35.86 ± 10.65         | 58.08 ± 6.11          | 82.59 ± 0.38 *        | 12.67 ± 1.53       | 23.95 ± 0.67 *      | 46.47 ± 0.94 *      | 68.99 ± 1.20 *      |
| terpinen-4-ol                         | 6.12 ± 7.78           | 20.13 ± 4.40          | 48.26 ± 10.32         | 85.31 ± 0.15 *        | 0.67 ± 0.34        | 0.87 ± 0.62         | 6.24 ± 3.02         | 11.60 ± 6.65        |
| α-terpineol                           | 12.26 ± 0.49 *        | 25.56 ± 6.82          | 55.90 ± 3.49          | 85.34 ± 0.57 *        | 1.59 ± 1.23        | 6.82 ± 7.50         | 7.37 ± 0.92 *       | 7.92 ± 5.67         |
| linalyl acetate <sup>1</sup>          | 22.89 ± 0.53 *        | 45.55 ± 0.18 *        | 71.59 ± 1.80 *        | 97.52 ± 0.17 *        | 11.01 ± 1.56       | 22.08 ± 3.23        | 37.11 ± 2.94        | 52.14 ± 2.66        |
| lavandulyl acetate                    | 21.12 ± 9.11          | 30.36 ± 1.42 *        | 60.87 ± 0.52 *        | 85.65 ± 0.89 *        | 5.74 ± 0.51 *      | 13.35 ± 3.56        | 26.77 ± 3.88        | 40.18 ± 4.20        |
| caryophyllene-oxide                   | 7.32 ± 9.52           | 34.35 ± 8.83          | 64.30 ± 4.71 *        | 87.66 ± 0.24 *        | 9.19 ± 4.48        | 21.90 ± 9.07        | 35.29 ± 6.63        | 48.68 ± 4.18        |
| <b>Total LEO</b>                      | <b>16.38 ± 0.96 *</b> | <b>32.51 ± 0.81 *</b> | <b>63.81 ± 0.21 *</b> | <b>94.93 ± 0.08 *</b> | <b>4.67 ± 0.44</b> | <b>10.07 ± 0.85</b> | <b>20.96 ± 3.24</b> | <b>33.83 ± 2.82</b> |

<sup>1</sup> Main LEO component.

\* Statistically significant reduction (p&lt;0.05)

**Table S2.** Skin hydration (arbitrary units) monitoring of each volunteer at every time point.

| Time<br>Measurement<br>Volunteer | T <sub>0</sub> |      |      |      |     | T <sub>30min</sub> |      |      |      |      | T <sub>60min</sub> |      |      |      |     | T <sub>120min</sub> |      |      |      |     |
|----------------------------------|----------------|------|------|------|-----|--------------------|------|------|------|------|--------------------|------|------|------|-----|---------------------|------|------|------|-----|
|                                  | 1              | 2    | 3    | Mean | SD  | 1                  | 2    | 3    | Mean | SD   | 1                  | 2    | 3    | Mean | SD  | 1                   | 2    | 3    | Mean | SD  |
| NEL                              |                |      |      |      |     |                    |      |      |      |      |                    |      |      |      |     |                     |      |      |      |     |
| 1                                | 30,2           | 29,7 | 31,2 | 30,4 | 0,8 | 40,5               | 40,4 | 40,6 | 40,5 | 0,1  | 41,4               | 39,2 | 36,2 | 38,9 | 2,6 | 39,2                | 38,7 | 39,2 | 39,0 | 0,3 |
| 2                                | 29,3           | 29,7 | 29,9 | 29,6 | 0,3 | 31,1               | 31,0 | 31,1 | 31,1 | 0,1  | 35,8               | 34,1 | 35,1 | 35,0 | 0,9 | 35,3                | 35,7 | 34,9 | 35,3 | 0,4 |
| 3                                | 38,5           | 38,8 | 38,3 | 38,5 | 0,3 | 41,3               | 40,8 | 39,1 | 40,4 | 1,2  | 42,3               | 40,5 | 40,7 | 41,2 | 1,0 | 37,5                | 37,8 | 37,3 | 37,5 | 0,3 |
| 4                                | 26,1           | 26,5 | 26,0 | 26,2 | 0,3 | 34,3               | 33,4 | 33,1 | 33,6 | 0,6  | 33,9               | 31,8 | 35,7 | 33,8 | 2,0 | 30,1                | 30,5 | 30,0 | 30,3 | 0,4 |
| 5                                | 22,3           | 21,6 | 22,8 | 22,2 | 0,6 | 33,0               | 32,1 | 31,1 | 32,1 | 1,0  | 33,9               | 31,8 | 35,7 | 33,8 | 2,0 | 31,3                | 30,6 | 31,8 | 31,2 | 0,6 |
| 6                                | 24,1           | 24,0 | 23,0 | 23,7 | 0,6 | 37,9               | 37,3 | 37,8 | 37,7 | 0,3  | 39,9               | 36,8 | 39,1 | 38,6 | 1,6 | 36,2                | 36,0 | 35,3 | 35,8 | 0,5 |
| 7                                | 21,9           | 21,6 | 21,3 | 21,6 | 0,3 | 38,4               | 38,1 | 38,1 | 38,2 | 0,2  | 35,0               | 36,6 | 37,4 | 36,3 | 1,2 | 32,9                | 32,6 | 32,3 | 32,6 | 0,3 |
| 8                                | 30,2           | 30,6 | 30,8 | 30,5 | 0,3 | 37,4               | 45,8 | 27,0 | 36,7 | 9,4  | 35,6               | 35,3 | 35,0 | 35,3 | 0,3 | 31,2                | 31,2 | 31,8 | 31,4 | 0,3 |
| 9                                | 21,8           | 20,3 | 19,8 | 20,6 | 1,0 | 37,9               | 37,8 | 36,0 | 37,2 | 1,1  | 36,9               | 39,5 | 31,1 | 35,8 | 4,3 | 30,8                | 31,3 | 30,0 | 30,7 | 0,7 |
| 10                               | 25,3           | 25,8 | 26,2 | 25,8 | 0,5 | 36,9               | 36,4 | 36,6 | 36,6 | 0,3  | 34,3               | 37,8 | 38,6 | 36,9 | 2,3 | 32,0                | 32,8 | 32,2 | 32,3 | 0,4 |
| Mean                             |                |      |      | 26,9 | 5,5 |                    |      |      | 36,4 | 3,2  |                    |      |      | 36,6 | 2,4 |                     |      |      | 33,6 | 3,1 |
| CEL                              |                |      |      |      |     |                    |      |      |      |      |                    |      |      |      |     |                     |      |      |      |     |
| 1                                | 31,1           | 28,9 | 30,3 | 30,1 | 1,1 | 40,1               | 40,0 | 40,2 | 40,1 | 0,1  | 39,1               | 36,9 | 33,9 | 36,6 | 2,6 | 32,2                | 31,7 | 33,2 | 32,4 | 0,8 |
| 2                                | 25,8           | 26,6 | 25,4 | 25,9 | 0,6 | 36,5               | 36,0 | 36,2 | 36,3 | 0,3  | 33,5               | 31,8 | 32,8 | 32,7 | 0,9 | 32,3                | 31,7 | 31,9 | 32,0 | 0,3 |
| 3                                | 37,4           | 36   | 35,5 | 36,3 | 1,0 | 36,6               | 35,5 | 35,2 | 35,8 | 0,7  | 40,0               | 38,2 | 38,4 | 38,8 | 1,0 | 39,5                | 39,8 | 40,3 | 39,9 | 0,4 |
| 4                                | 24,2           | 23,3 | 22,5 | 23,3 | 0,9 | 30,9               | 29,6 | 30,2 | 30,3 | 0,7  | 31,6               | 29,5 | 33,4 | 31,5 | 2,0 | 28,1                | 28,5 | 28,0 | 28,2 | 0,3 |
| 5                                | 21,7           | 22,1 | 21,7 | 21,8 | 0,2 | 27,2               | 27,1 | 28,0 | 27,5 | 0,5  | 30,6               | 28,5 | 30,4 | 29,8 | 1,2 | 24,3                | 23,6 | 24,8 | 24,3 | 0,6 |
| 6                                | 25,8           | 25,3 | 27   | 26,0 | 0,9 | 45,2               | 26,2 | 24,9 | 32,1 | 11,4 | 37,6               | 34,5 | 36,8 | 36,3 | 1,6 | 26,1                | 26,0 | 25,0 | 25,7 | 0,6 |
| 7                                | 21,2           | 22,2 | 20,6 | 21,3 | 0,8 | 38,0               | 37,7 | 37,7 | 37,8 | 0,2  | 32,7               | 34,3 | 35,1 | 34,0 | 1,2 | 23,9                | 23,6 | 23,3 | 23,6 | 0,3 |
| 8                                | 30,4           | 29,8 | 30,3 | 30,2 | 0,3 | 37,0               | 45,4 | 26,6 | 36,4 | 9,4  | 33,3               | 33,0 | 32,7 | 33,0 | 0,3 | 32,2                | 29,7 | 32,8 | 31,6 | 1,7 |
| 9                                | 20,6           | 21,4 | 19,9 | 20,6 | 0,8 | 37,5               | 37,4 | 35,6 | 36,9 | 1,1  | 34,6               | 37,2 | 28,8 | 33,5 | 4,3 | 23,8                | 22,3 | 23,0 | 23,1 | 0,8 |
| 10                               | 30,0           | 29,1 | 29,7 | 29,6 | 0,5 | 40,7               | 30,6 | 30,7 | 34,0 | 5,8  | 32,0               | 35,5 | 36,3 | 34,6 | 2,3 | 29,0                | 27,8 | 28,2 | 28,4 | 0,6 |
| Mean                             |                |      |      | 26,5 | 5,0 |                    |      |      | 34,7 | 3,8  |                    |      |      | 34,1 | 2,6 |                     |      |      | 28,9 | 5,2 |

| Time                     |  | T <sub>0</sub> |      |      |      |     | T <sub>30min</sub> |      |      |      |     | T <sub>60min</sub> |      |      |      |     | T <sub>120min</sub> |      |      |      |     |
|--------------------------|--|----------------|------|------|------|-----|--------------------|------|------|------|-----|--------------------|------|------|------|-----|---------------------|------|------|------|-----|
| Measurement<br>Volunteer |  | 1              | 2    | 3    | Mean | SD  | 1                  | 2    | 3    | Mean | SD  | 1                  | 2    | 3    | Mean | SD  | 1                   | 2    | 3    | Mean | SD  |
|                          |  | Untreated      |      |      |      |     |                    |      |      |      |     |                    |      |      |      |     |                     |      |      |      |     |
| 1                        |  | 29,34          | 30,8 | 29,9 | 30,0 | 0,7 | 29,6               | 30,9 | 29,3 | 30,0 | 0,9 | 31,6               | 31,8 | 32,9 | 32,1 | 0,7 | 32,7                | 33,6 | 33,2 | 33,1 | 0,5 |
| 2                        |  | 29,14          | 29,3 | 29,6 | 29,3 | 0,2 | 29,1               | 30,3 | 28,5 | 29,3 | 0,9 | 26,9               | 23,5 | 30,0 | 26,8 | 3,3 | 24,6                | 25,4 | 28,3 | 26,1 | 1,9 |
| 3                        |  | 38,54          | 37,7 | 37,2 | 37,8 | 0,7 | 37,2               | 35,9 | 36,2 | 36,5 | 0,7 | 36,4               | 38,4 | 30,8 | 35,2 | 3,9 | 24,5                | 25,8 | 24,0 | 24,7 | 0,9 |
| 4                        |  | 27,24          | 28,5 | 27,3 | 27,7 | 0,7 | 27,7               | 28,9 | 28,3 | 28,3 | 0,6 | 31,4               | 32,4 | 29,3 | 31,0 | 1,6 | 25,7                | 27,6 | 26,3 | 26,5 | 1,0 |
| 5                        |  | 23,74          | 23,1 | 21,9 | 22,9 | 0,9 | 21,3               | 20,4 | 21,2 | 21,0 | 0,5 | 28,9               | 25,4 | 28,5 | 27,6 | 1,9 | 24,8                | 25,0 | 24,5 | 24,7 | 0,3 |
| 6                        |  | 23,34          | 23,8 | 23,3 | 23,5 | 0,3 | 19,7               | 19,4 | 16,0 | 18,4 | 2,1 | 20,1               | 17,8 | 18,9 | 18,9 | 1,2 | 22,8                | 25,2 | 20,9 | 22,9 | 2,2 |
| 7                        |  | 21,64          | 21,9 | 21,8 | 21,8 | 0,1 | 29,6               | 28,8 | 23,4 | 27,3 | 3,4 | 28,9               | 27,4 | 27,1 | 27,8 | 1,0 | 26,1                | 25,1 | 26,4 | 25,8 | 0,7 |
| 8                        |  | 31,14          | 30,7 | 31   | 30,9 | 0,2 | 28,3               | 30,7 | 29,0 | 29,4 | 1,2 | 26,8               | 28,3 | 22,9 | 26,0 | 2,8 | 23,0                | 25,2 | 26,6 | 24,9 | 1,8 |
| 9                        |  | 21,14          | 20,3 | 19,8 | 20,4 | 0,7 | 19,3               | 21,4 | 22,3 | 21,0 | 1,5 | 21,6               | 24,7 | 22,4 | 22,9 | 1,6 | 23,3                | 20,1 | 22,6 | 22,0 | 1,7 |
| 10                       |  | 25,00          | 25,6 | 26,1 | 25,6 | 0,6 | 23,7               | 24,6 | 26,8 | 25,1 | 1,6 | 23,3               | 25,9 | 24,9 | 24,7 | 1,3 | 22,1                | 21,0 | 22,0 | 21,7 | 0,6 |
| Mean                     |  |                |      |      | 27,0 | 5,3 |                    |      |      | 26,6 | 5,4 |                    |      |      | 27,3 | 4,7 |                     |      |      | 25,2 | 3,2 |

**Table S3.** Monitoring of TEWL (g/m<sup>2</sup>/h) of each volunteer at every time point.

| Volunteer | Position       | Normal barrier |     | Disrupted barrier |     | NEL                |     |                    |     |                     |     |
|-----------|----------------|----------------|-----|-------------------|-----|--------------------|-----|--------------------|-----|---------------------|-----|
|           |                | baseline       |     | T <sub>0</sub>    |     | T <sub>30min</sub> |     | T <sub>60min</sub> |     | T <sub>120min</sub> |     |
|           |                | TEWL           | SD  | TEWL              | SD  | TEWL               | SD  | TEWL               | SD  | TEWL                | SD  |
| 1         | a <sup>1</sup> | 4.2            | 0.1 | 8.8               | 0.1 | 6.6                | 0.1 | 5.2                | 0.1 | 4.9                 | 0.1 |
|           | b <sup>2</sup> | 3.9            | 0.1 | 8.3               | 0.1 |                    |     |                    |     |                     |     |
|           | c <sup>3</sup> | 4.3            | 0.1 | 9.0               | 0.1 |                    |     |                    |     |                     |     |
| 2         | a              | 6.5            | 0.1 | 10.2              | 0.1 | 5.7                | 0.1 | 5.2                | 0.1 | 5.0                 | 0.1 |
|           | b              | 6.0            | 0.1 | 10.4              | 0.1 |                    |     |                    |     |                     |     |
|           | c              | 5.9            | 0.1 | 10.3              | 0.1 |                    |     |                    |     |                     |     |
| 3         | a              | 4.4            | 0.1 | 10.7              | 0.1 | 6.0                | 0.1 | 5.9                | 0.1 | 5.3                 | 0.1 |
|           | b              | 3.7            | 0.1 | 10.3              | 0.1 |                    |     |                    |     |                     |     |
|           | c              | 3.4            | 0.1 | 10.1              | 0.1 |                    |     |                    |     |                     |     |
| 4         | a              | 9.8            | 0.1 | 11.2              | 0.1 | 10.3               | 0.0 | 8.8                | 0.1 | 7.4                 | 0.1 |
|           | b              | 9.2            | 0.1 | 10.0              | 0.1 |                    |     |                    |     |                     |     |
|           | c              | 8.6            | 0.1 | 10.9              | 0.1 |                    |     |                    |     |                     |     |
| 5         | a              | 9.0            | 0.1 | 12.0              | 0.1 | 8.8                | 0.1 | 8.6                | 0.1 | 8.1                 | 0.1 |
|           | b              | 9.1            | 0.1 | 11.5              | 0.1 |                    |     |                    |     |                     |     |
|           | c              | 9.1            | 0.1 | 11.1              | 0.1 |                    |     |                    |     |                     |     |
| 6         | a              | 5.1            | 0.1 | 9.6               | 0.1 | 7.2                | 0.1 | 6.1                | 0.1 | 5.6                 | 0.1 |
|           | b              | 4.3            | 0.1 | 9.4               | 0.1 |                    |     |                    |     |                     |     |
|           | c              | 4.4            | 0.1 | 8.5               | 0.1 |                    |     |                    |     |                     |     |
| 7         | a              | 5.7            | 0.1 | 9.3               | 0.1 | 6.9                | 0.1 | 6.7                | 0.1 | 5.8                 | 0.1 |
|           | b              | 4.6            | 0.1 | 9.2               | 0.1 |                    |     |                    |     |                     |     |
|           | c              | 4.5            | 0.1 | 9.7               | 0.1 |                    |     |                    |     |                     |     |
| 8         | a              | 5.3            | 0.1 | 9.5               | 0.1 | 6.0                | 0.1 | 5.2                | 0.1 | 4.8                 | 0.1 |

| Volunteer | Position | Normal barrier |     | Disrupted barrier |     | NEL                |     |                    |     |                     |     |
|-----------|----------|----------------|-----|-------------------|-----|--------------------|-----|--------------------|-----|---------------------|-----|
|           |          | baseline       |     | T <sub>0</sub>    |     | T <sub>30min</sub> |     | T <sub>60min</sub> |     | T <sub>120min</sub> |     |
|           |          | TEWL           | SD  | TEWL              | SD  | TEWL               | SD  | TEWL               | SD  | TEWL                | SD  |
|           |          |                |     |                   |     |                    |     |                    |     |                     |     |
| 9         | b        | 4.0            | 0.1 | 9.8               | 0.1 |                    |     |                    |     |                     |     |
|           | c        | 4.1            | 0.1 | 9.3               | 0.1 |                    |     |                    |     |                     |     |
|           | a        | 7.7            | 0.0 | 10.2              | 0.1 | 11.7               | 0.1 | 8.3                | 0.1 | 7.7                 | 0.1 |
|           | b        | 7.5            | 0.1 | 9.9               | 0.1 |                    |     |                    |     |                     |     |
|           | c        | 7.8            | 0.1 | 10.2              | 0.1 |                    |     |                    |     |                     |     |
| 10        | a        | 9.8            | 0.1 | 11.3              | 0.1 | 9.2                | 0.1 | 8.4                | 0.1 | 8.2                 | 0.1 |
|           | b        | 9.6            | 0.0 | 10.1              | 0.1 |                    |     |                    |     |                     |     |
|           | c        | 9.9            | 0.1 | 11.0              | 0.1 |                    |     |                    |     |                     |     |
| Mean      |          | 6.4            | 2.3 | 10.1              | 0.9 | 7.8                | 2.1 | 6.8                | 1.5 | 6.3                 | 1.4 |
| CEL       |          |                |     |                   |     |                    |     |                    |     |                     |     |
| 1         | a        | 5.4            | 0.1 | 10.3              | 0.1 | 8.0                | 0.0 | 7.3                | 0.1 | 6.0                 | 0.1 |
|           | b        | 4.9            | 0.1 | 10.5              | 0.0 |                    |     |                    |     |                     |     |
|           | c        | 5.6            | 0.1 | 10.2              | 0.0 |                    |     |                    |     |                     |     |
| 2         | a        | 5.0            | 0.0 | 8.8               | 0.1 | 7.8                | 0.1 | 6.9                | 0.0 | 5.8                 | 0.1 |
|           | b        | 5.5            | 0.1 | 8.4               | 0.1 |                    |     |                    |     |                     |     |
|           | c        | 5.8            | 0.1 | 8.0               | 0.1 |                    |     |                    |     |                     |     |
| 3         | a        | 3.2            | 0.1 | 10.3              | 0.0 | 6.4                | 0.1 | 6.2                | 0.1 | 5.4                 | 0.0 |
|           | b        | 3.5            | 0.0 | 10.9              | 0.1 |                    |     |                    |     |                     |     |
|           | c        | 4.1            | 0.0 | 10.6              | 0.0 |                    |     |                    |     |                     |     |
| 4         | a        | 8.5            | 0.1 | 9.3               | 0.1 | 9.6                | 0.0 | 8.3                | 0.0 | 9.6                 | 0.1 |
|           | b        | 8.9            | 0.1 | 9.8               | 0.1 |                    |     |                    |     |                     |     |
|           | c        | 8.6            | 0.1 | 9.5               | 0.0 |                    |     |                    |     |                     |     |
| 5         | a        | 11.0           | 0.0 | 12.5              | 0.0 | 11.3               | 0.0 | 10.1               | 0.0 | 9.8                 | 0.0 |

| Volunteer      | Position | Normal barrier |     | Disrupted barrier |     | NEL                |     |                    |     |                     |     |
|----------------|----------|----------------|-----|-------------------|-----|--------------------|-----|--------------------|-----|---------------------|-----|
|                |          | baseline       |     | T <sub>0</sub>    |     | T <sub>30min</sub> |     | T <sub>60min</sub> |     | T <sub>120min</sub> |     |
|                |          | TEWL           | SD  | TEWL              | SD  | TEWL               | SD  | TEWL               | SD  | TEWL                | SD  |
|                |          |                |     |                   |     |                    |     |                    |     |                     |     |
| 6              | b        | 9.8            | 0.1 | 10.2              | 0.1 |                    |     |                    |     |                     |     |
|                | c        | 10.1           | 0.1 | 10.8              | 0.1 |                    |     |                    |     |                     |     |
|                | a        | 6.1            | 0.0 | 8.4               | 0.0 | 7.1                | 0.1 | 6.9                | 0.1 | 7.1                 | 0.1 |
|                | b        | 5.3            | 0.0 | 8.2               | 0.1 |                    |     |                    |     |                     |     |
|                | c        | 6.4            | 0.1 | 8.6               | 0.1 |                    |     |                    |     |                     |     |
| 7              | a        | 5.7            | 0.1 | 9.1               | 0.1 | 8.3                | 0.1 | 7.5                | 0.1 | 7.3                 | 0.0 |
|                | b        | 5.7            | 0.0 | 9.4               | 0.1 |                    |     |                    |     |                     |     |
|                | c        | 4.8            | 0.1 | 9.6               | 0.0 |                    |     |                    |     |                     |     |
| 8              | a        | 3.3            | 0.1 | 10.6              | 0.0 | 8.2                | 0.1 | 6.0                | 0.1 | 5.2                 | 0.1 |
|                | b        | 3.9            | 0.1 | 10.3              | 0.0 |                    |     |                    |     |                     |     |
|                | c        | 4.2            | 0.0 | 10.9              | 0.0 |                    |     |                    |     |                     |     |
| 9              | a        | 8.2            | 0.0 | 9.4               | 0.1 | 8.9                | 0.1 | 8.7                | 0.0 | 8.5                 | 0.0 |
|                | b        | 7.8            | 0.1 | 9.2               | 0.1 |                    |     |                    |     |                     |     |
|                | c        | 8.1            | 0.1 | 8.8               | 0.1 |                    |     |                    |     |                     |     |
| 10             | a        | 11.3           | 0.1 | 12.6              | 0.1 | 12.2               | 0.0 | 12.0               | 0.0 | 11.5                | 0.1 |
|                | b        | 10.6           | 0.1 | 11.0              | 0.1 |                    |     |                    |     |                     |     |
|                | c        | 11.2           | 0.1 | 11.7              | 0.1 |                    |     |                    |     |                     |     |
| Mean           | 1,2,3    | 6.8            | 2.5 | 9.9               | 1.2 | 8.8                | 1.8 | 8.0                | 1.9 | 7.6                 | 2.1 |
| untreated skin |          |                |     |                   |     |                    |     |                    |     |                     |     |
| 1              |          | 6.0            | 0.1 | 7.0               | 0.1 | 8.9                | 0.1 | 8.1                | 0.1 | 7.1                 | 0.1 |
| 2              |          | 5.8            | 0.1 | 8.1               | 0.0 | 6.7                | 0.1 | 6.5                | 0.1 | 6.6                 | 0.1 |
| 3              |          | 8.1            | 0.1 | 10.3              | 0.1 | 11.1               | 0.1 | 9.7                | 0.1 | 8.9                 | 0.1 |
| 4              |          | 8.1            | 0.1 | 11.3              | 0.1 | 11.8               | 0.1 | 10.2               | 0.1 | 10.2                | 0.1 |



---

| Volunteer | Position | Normal barrier |     | Disrupted barrier |     | NEL                |     |                    |     |                     |     |
|-----------|----------|----------------|-----|-------------------|-----|--------------------|-----|--------------------|-----|---------------------|-----|
|           |          | baseline       |     | T <sub>0</sub>    |     | T <sub>30min</sub> |     | T <sub>60min</sub> |     | T <sub>120min</sub> |     |
|           |          | TEWL           | SD  | TEWL              | SD  | TEWL               | SD  | TEWL               | SD  | TEWL                | SD  |
| 5         |          | 8.8            | 0.1 | 12.7              | 0.1 | 11.6               | 0.1 | 11.4               | 0.0 | 11.4                | 0.1 |
| 6         |          | 8.3            | 0.1 | 11.5              | 0.1 | 11.9               | 0.1 | 11.6               | 0.1 | 11.8                | 0.1 |
| 7         |          | 6.2            | 0.1 | 8.2               | 0.1 | 8.8                | 0.1 | 8.0                | 0.1 | 7.4                 | 0.1 |
| 8         |          | 6.0            | 0.1 | 8.4               | 0.1 | 7.4                | 0.1 | 7.3                | 0.1 | 7.2                 | 0.1 |
| 9         |          | 4.3            | 0.1 | 11.9              | 0.1 | 13.9               | 0.1 | 11.2               | 0.1 | 10.9                | 0.1 |
| 10        |          | 3.4            | 0.1 | 15.6              | 0.1 | 12.9               | 0.1 | 12.2               | 0.1 | 12.1                | 0.1 |
| Mean      |          | 6.5            | 1.8 | 10.5              | 2.6 | 10.5               | 2.4 | 9.6                | 2.0 | 9.4                 | 2.2 |

<sup>1</sup> baseline and T<sub>0</sub> TEWL of skin cite for measurement 30 min

<sup>2</sup> baseline and T<sub>0</sub> TEWL of skin cite for measurement 60 min

<sup>3</sup> baseline and T<sub>0</sub> TEWL of skin cite for measurement 120 min
